# Supplementary material
Source: publisher figshare collection journal article supplement (https://acs.figshare.com/ndownloader/files/3851935)
Supplement: Supplementary file 1 [file 3851935]

 
data_p21-n 
  
_audit_creation_method            SHELXL-97 
_chemical_name_systematic 
; 
 ? 
; 
_chemical_name_common             ? 
_chemical_melting_point           ? 
_chemical_formula_moiety          ? 
_chemical_formula_sum 
 'C49 H78 N2 Pt Sn2' 
_chemical_formula_weight          1127.60 
  
loop_ 
 _atom_type_symbol 
 _atom_type_description 
 _atom_type_scat_dispersion_real 
 _atom_type_scat_dispersion_imag 
 _atom_type_scat_source 
 'C'  'C'   0.0033   0.0016 
 'International Tables Vol C Tables 4.2.6.8 and 6.1.1.4' 
 'H'  'H'   0.0000   0.0000 
 'International Tables Vol C Tables 4.2.6.8 and 6.1.1.4' 
 'N'  'N'   0.0061   0.0033 
 'International Tables Vol C Tables 4.2.6.8 and 6.1.1.4' 
 'Sn'  'Sn'  -0.6537   1.4246 
 'International Tables Vol C Tables 4.2.6.8 and 6.1.1.4' 
 'Pt'  'Pt'  -1.7033   8.3905 
 'International Tables Vol C Tables 4.2.6.8 and 6.1.1.4' 
  
_symmetry_cell_setting            Monoclinic 
_symmetry_space_group_name_H-M    P2(1)/n 
  
loop_ 
 _symmetry_equiv_pos_as_xyz 
 'x, y, z' 
 '-x+1/2, y+1/2, -z+1/2' 
 '-x, -y, -z' 
 'x-1/2, -y-1/2, z-1/2' 
  
_cell_length_a                    12.5045(3) 
_cell_length_b                    21.6120(6) 
_cell_length_c                    21.7113(6) 
_cell_angle_alpha                 90.00 
_cell_angle_beta                  99.9230(10) 
_cell_angle_gamma                 90.00 
_cell_volume                      5779.6(3) 
_cell_formula_units_Z             4 
_cell_measurement_temperature     296(2) 
_cell_measurement_reflns_used     9985 
_cell_measurement_theta_min       2.25 
_cell_measurement_theta_max       26.69 
  
_exptl_crystal_description        Block 
_exptl_crystal_colour             orange 
_exptl_crystal_size_max           0.20 
_exptl_crystal_size_mid           0.10 
_exptl_crystal_size_min           0.05 
_exptl_crystal_density_meas       ? 
_exptl_crystal_density_diffrn     1.296 
_exptl_crystal_density_method     'not measured' 
_exptl_crystal_F_000              2256 
_exptl_absorpt_coefficient_mu     3.299 
_exptl_absorpt_correction_type    Multi-scan 
_exptl_absorpt_correction_T_min   0.5583 
_exptl_absorpt_correction_T_max   0.8524 
_exptl_absorpt_process_details    '(SADABS 2007/4 Bruker)' 
  
_exptl_special_details 
; 
 ? 
; 
  
_diffrn_ambient_temperature       296(2) 
_diffrn_radiation_wavelength      0.71073 
_diffrn_radiation_type            MoK\a 
_diffrn_radiation_source          'fine-focus sealed tube' 
_diffrn_radiation_monochromator   graphite 
_diffrn_measurement_device_type   'Bruker APEX-II CCD' 
_diffrn_measurement_method        'omega scans' 
_diffrn_detector_area_resol_mean  ? 
_diffrn_reflns_number             58956 
_diffrn_reflns_av_R_equivalents   0.0412 
_diffrn_reflns_av_sigmaI/netI     0.0360 
_diffrn_reflns_limit_h_min        -16 
_diffrn_reflns_limit_h_max        16 
_diffrn_reflns_limit_k_min        -28 
_diffrn_reflns_limit_k_max        28 
_diffrn_reflns_limit_l_min        -28 
_diffrn_reflns_limit_l_max        28 
_diffrn_reflns_theta_min          1.76 
_diffrn_reflns_theta_max          28.00 
_reflns_number_total              13964 
_reflns_number_gt                 10472 
_reflns_threshold_expression      >2sigma(I) 
  
_computing_data_collection        'APEX2 v2.2-0 (Bruker, 2007)' 
_computing_cell_refinement        'SAINT+  V7.46A (Bruker, 2007)' 
_computing_data_reduction         'SAINT+  V7.46A (Bruker, 2007)' 
_computing_structure_solution     'SHELXS/SHELXTL V6.12 (Bruker, 2001)' 
_computing_structure_refinement   'SHELXL/SHELXTL V6.12 (Bruker, 2001)'' 
_computing_molecular_graphics     'XSHELL v4.02 (Bruker, 2000)'
_computing_publication_material   'XCIF v6.12 (Bruker, 2001)' 

  
_refine_special_details 
; 
 Refinement of F^2^ against ALL reflections.  The weighted R-factor wR and 
 goodness of fit S are based on F^2^, conventional R-factors R are based 
 on F, with F set to zero for negative F^2^. The threshold expression of 
 F^2^ > 2sigma(F^2^) is used only for calculating R-factors(gt) etc. and is 
 not relevant to the choice of reflections for refinement.  R-factors based 
 on F^2^ are statistically about twice as large as those based on F, and R- 
 factors based on ALL data will be even larger. 
; 
  
_refine_ls_structure_factor_coef  Fsqd 
_refine_ls_matrix_type            full 
_refine_ls_weighting_scheme       calc 
_refine_ls_weighting_details 
 'calc w=1/[\s^2^(Fo^2^)+(0.0810P)^2^+4.8541P] where P=(Fo^2^+2Fc^2^)/3' 
_atom_sites_solution_primary      direct 
_atom_sites_solution_secondary    difmap 
_atom_sites_solution_hydrogens    geom 
_refine_ls_hydrogen_treatment     constr
_refine_ls_extinction_method      none 
_refine_ls_extinction_coef        ? 
_refine_ls_number_reflns          13964 
_refine_ls_number_parameters      487 
_refine_ls_number_restraints      0 
_refine_ls_R_factor_all           0.0593 
_refine_ls_R_factor_gt            0.0387 
_refine_ls_wR_factor_ref          0.1482 
_refine_ls_wR_factor_gt           0.1350 
_refine_ls_goodness_of_fit_ref    1.105 
_refine_ls_restrained_S_all       1.105 
_refine_ls_shift/su_max           0.001 
_refine_ls_shift/su_mean          0.000 
  
loop_ 
 _atom_site_label 
 _atom_site_type_symbol 
 _atom_site_fract_x 
 _atom_site_fract_y 
 _atom_site_fract_z 
 _atom_site_U_iso_or_equiv 
 _atom_site_adp_type 
 _atom_site_occupancy 
 _atom_site_symmetry_multiplicity 
 _atom_site_calc_flag 
 _atom_site_refinement_flags 
 _atom_site_disorder_assembly 
 _atom_site_disorder_group 
Pt1 Pt 0.507130(17) 0.635458(10) 0.240574(10) 0.04072(8) Uani 1 1 d . . . 
Sn1 Sn 0.63130(3) 0.60764(2) 0.15541(2) 0.05060(12) Uani 1 1 d . . . 
Sn2 Sn 0.36800(3) 0.674955(18) 0.312974(19) 0.04281(11) Uani 1 1 d . . . 
N1 N 0.6907(4) 0.7000(3) 0.3300(3) 0.0572(14) Uani 1 1 d . . . 
N2 N 0.3296(4) 0.5419(3) 0.1863(3) 0.0562(13) Uani 1 1 d . . . 
C1 C 0.6233(5) 0.6800(3) 0.2937(3) 0.0467(13) Uani 1 1 d . . . 
C2 C 0.7751(5) 0.7260(4) 0.3788(4) 0.066(2) Uani 1 1 d . . . 
C3 C 0.8769(8) 0.6878(7) 0.3830(7) 0.160(7) Uani 1 1 d . . . 
H3A H 0.8665 0.6487 0.4020 0.241 Uiso 1 1 calc R . . 
H3B H 0.9363 0.7093 0.4080 0.241 Uiso 1 1 calc R . . 
H3C H 0.8928 0.6812 0.3418 0.241 Uiso 1 1 calc R . . 
C4 C 0.7950(10) 0.7932(6) 0.3594(6) 0.133(5) Uani 1 1 d . . . 
H4A H 0.8138 0.7933 0.3183 0.199 Uiso 1 1 calc R . . 
H4B H 0.8532 0.8109 0.3886 0.199 Uiso 1 1 calc R . . 
H4C H 0.7302 0.8171 0.3590 0.199 Uiso 1 1 calc R . . 
C5 C 0.7320(7) 0.7256(6) 0.4394(4) 0.106(3) Uani 1 1 d . . . 
H5A H 0.6687 0.7513 0.4355 0.159 Uiso 1 1 calc R . . 
H5B H 0.7866 0.7412 0.4724 0.159 Uiso 1 1 calc R . . 
H5C H 0.7134 0.6841 0.4491 0.159 Uiso 1 1 calc R . . 
C6 C 0.3942(5) 0.5783(3) 0.2033(3) 0.0482(14) Uani 1 1 d . . . 
C7 C 0.2455(6) 0.4951(3) 0.1701(3) 0.0604(17) Uani 1 1 d . . . 
C8 C 0.2542(8) 0.4685(5) 0.1074(4) 0.108(4) Uani 1 1 d . . . 
H8A H 0.2532 0.5014 0.0776 0.162 Uiso 1 1 calc R . . 
H8B H 0.1941 0.4412 0.0941 0.162 Uiso 1 1 calc R . . 
H8C H 0.3210 0.4458 0.1103 0.162 Uiso 1 1 calc R . . 
C9 C 0.1373(6) 0.5255(5) 0.1704(6) 0.105(3) Uani 1 1 d . . . 
H9A H 0.1365 0.5437 0.2107 0.158 Uiso 1 1 calc R . . 
H9B H 0.0807 0.4951 0.1619 0.158 Uiso 1 1 calc R . . 
H9C H 0.1256 0.5571 0.1389 0.158 Uiso 1 1 calc R . . 
C10 C 0.2614(9) 0.4472(5) 0.2219(6) 0.120(4) Uani 1 1 d . . . 
H10A H 0.3173 0.4187 0.2153 0.181 Uiso 1 1 calc R . . 
H10B H 0.1948 0.4250 0.2216 0.181 Uiso 1 1 calc R . . 
H10C H 0.2822 0.4674 0.2615 0.181 Uiso 1 1 calc R . . 
C21 C 0.7880(7) 0.6602(5) 0.1655(4) 0.083(3) Uani 1 1 d . . . 
C22 C 0.7698(9) 0.7267(5) 0.1775(5) 0.116(4) Uani 1 1 d . . . 
H22A H 0.7312 0.7306 0.2119 0.174 Uiso 1 1 calc R . . 
H22B H 0.7279 0.7451 0.1408 0.174 Uiso 1 1 calc R . . 
H22C H 0.8385 0.7475 0.1875 0.174 Uiso 1 1 calc R . . 
C23 C 0.8635(8) 0.6387(6) 0.2216(5) 0.120(4) Uani 1 1 d . . . 
H23A H 0.9316 0.6600 0.2243 0.180 Uiso 1 1 calc R . . 
H23B H 0.8751 0.5950 0.2186 0.180 Uiso 1 1 calc R . . 
H23C H 0.8329 0.6473 0.2583 0.180 Uiso 1 1 calc R . . 
C24 C 0.8407(9) 0.6586(8) 0.1078(5) 0.150(6) Uani 1 1 d . . . 
H24A H 0.9133 0.6744 0.1178 0.225 Uiso 1 1 calc R . . 
H24B H 0.7994 0.6836 0.0756 0.225 Uiso 1 1 calc R . . 
H24C H 0.8427 0.6167 0.0932 0.225 Uiso 1 1 calc R . . 
C25 C 0.6697(8) 0.5066(4) 0.1581(5) 0.087(3) Uani 1 1 d . . . 
C26 C 0.7056(12) 0.4883(6) 0.2270(6) 0.146(5) Uani 1 1 d . . . 
H26A H 0.6471 0.4957 0.2495 0.219 Uiso 1 1 calc R . . 
H26B H 0.7674 0.5126 0.2449 0.219 Uiso 1 1 calc R . . 
H26C H 0.7245 0.4452 0.2295 0.219 Uiso 1 1 calc R . . 
C27 C 0.7504(11) 0.4879(6) 0.1170(7) 0.165(7) Uani 1 1 d . . . 
H27A H 0.7602 0.4439 0.1189 0.247 Uiso 1 1 calc R . . 
H27B H 0.8186 0.5080 0.1315 0.247 Uiso 1 1 calc R . . 
H27C H 0.7236 0.5001 0.0747 0.247 Uiso 1 1 calc R . . 
C28 C 0.5766(9) 0.4695(5) 0.1381(6) 0.122(4) Uani 1 1 d . . . 
H28A H 0.5416 0.4827 0.0973 0.183 Uiso 1 1 calc R . . 
H28B H 0.5271 0.4738 0.1670 0.183 Uiso 1 1 calc R . . 
H28C H 0.5980 0.4270 0.1363 0.183 Uiso 1 1 calc R . . 
C29 C 0.5412(7) 0.6292(4) 0.0605(3) 0.071(2) Uani 1 1 d . . . 
C30 C 0.6000(9) 0.6055(7) 0.0093(4) 0.124(4) Uani 1 1 d . . . 
H30A H 0.6220 0.5634 0.0180 0.187 Uiso 1 1 calc R . . 
H30B H 0.6628 0.6306 0.0078 0.187 Uiso 1 1 calc R . . 
H30C H 0.5521 0.6075 -0.0303 0.187 Uiso 1 1 calc R . . 
C31 C 0.5338(10) 0.7000(5) 0.0524(5) 0.117(4) Uani 1 1 d . . . 
H31A H 0.4909 0.7097 0.0125 0.176 Uiso 1 1 calc R . . 
H31B H 0.6054 0.7169 0.0546 0.176 Uiso 1 1 calc R . . 
H31C H 0.5004 0.7175 0.0850 0.176 Uiso 1 1 calc R . . 
C32 C 0.4245(8) 0.6044(5) 0.0512(4) 0.095(3) Uani 1 1 d . . . 
H32A H 0.3922 0.6075 0.0079 0.142 Uiso 1 1 calc R . . 
H32B H 0.3829 0.6283 0.0760 0.142 Uiso 1 1 calc R . . 
H32C H 0.4254 0.5618 0.0641 0.142 Uiso 1 1 calc R . . 
C41 C 0.2237(5) 0.7303(3) 0.2694(3) 0.0519(15) Uani 1 1 d . . . 
C42 C 0.1983(5) 0.7412(3) 0.2030(4) 0.0620(18) Uani 1 1 d . . . 
C43 C 0.1175(6) 0.7816(3) 0.1806(4) 0.070(2) Uani 1 1 d . . . 
H43 H 0.1019 0.7879 0.1376 0.083 Uiso 1 1 calc R . . 
C44 C 0.0579(6) 0.8136(3) 0.2168(5) 0.077(2) Uani 1 1 d . . . 
C45 C 0.0814(6) 0.8024(3) 0.2799(5) 0.070(2) Uani 1 1 d . . . 
H45 H 0.0409 0.8233 0.3055 0.084 Uiso 1 1 calc R . . 
C46 C 0.1622(5) 0.7617(3) 0.3084(4) 0.0599(17) Uani 1 1 d . . . 
C47 C 0.2607(8) 0.7096(4) 0.1572(4) 0.087(3) Uani 1 1 d . . . 
H47A H 0.2574 0.6656 0.1622 0.131 Uiso 1 1 calc R . . 
H47B H 0.3351 0.7228 0.1654 0.131 Uiso 1 1 calc R . . 
H47C H 0.2289 0.7206 0.1152 0.131 Uiso 1 1 calc R . . 
C48 C -0.0301(8) 0.8606(4) 0.1900(6) 0.107(4) Uani 1 1 d . . . 
H48A H -0.0725 0.8710 0.2214 0.161 Uiso 1 1 calc R . . 
H48B H -0.0764 0.8429 0.1545 0.161 Uiso 1 1 calc R . . 
H48C H 0.0036 0.8973 0.1773 0.161 Uiso 1 1 calc R . . 
C49 C 0.1791(6) 0.7547(4) 0.3777(4) 0.073(2) Uani 1 1 d . . . 
H49A H 0.2197 0.7894 0.3970 0.109 Uiso 1 1 calc R . . 
H49B H 0.2185 0.7172 0.3896 0.109 Uiso 1 1 calc R . . 
H49C H 0.1100 0.7530 0.3912 0.109 Uiso 1 1 calc R . . 
C50 C 0.4390(5) 0.7485(3) 0.3780(3) 0.0484(14) Uani 1 1 d . . . 
C51 C 0.4701(5) 0.8031(3) 0.3501(3) 0.0548(15) Uani 1 1 d . . . 
C52 C 0.5112(6) 0.8535(3) 0.3879(4) 0.069(2) Uani 1 1 d . . . 
H52 H 0.5319 0.8890 0.3687 0.083 Uiso 1 1 calc R . . 
C53 C 0.5220(6) 0.8524(5) 0.4528(4) 0.082(3) Uani 1 1 d . . . 
C54 C 0.4910(6) 0.7981(4) 0.4796(4) 0.071(2) Uani 1 1 d . . . 
H54 H 0.4982 0.7960 0.5229 0.085 Uiso 1 1 calc R . . 
C55 C 0.4498(5) 0.7468(3) 0.4444(3) 0.0593(17) Uani 1 1 d . . . 
C56 C 0.4616(6) 0.8114(3) 0.2808(3) 0.0651(18) Uani 1 1 d . . . 
H56A H 0.3867 0.8096 0.2613 0.098 Uiso 1 1 calc R . . 
H56B H 0.5011 0.7790 0.2644 0.098 Uiso 1 1 calc R . . 
H56C H 0.4916 0.8507 0.2724 0.098 Uiso 1 1 calc R . . 
C57 C 0.5644(9) 0.9075(5) 0.4915(5) 0.121(4) Uani 1 1 d . . . 
H57A H 0.5149 0.9415 0.4818 0.181 Uiso 1 1 calc R . . 
H57B H 0.6342 0.9189 0.4824 0.181 Uiso 1 1 calc R . . 
H57C H 0.5711 0.8974 0.5350 0.181 Uiso 1 1 calc R . . 
C58 C 0.4182(8) 0.6920(4) 0.4793(4) 0.084(2) Uani 1 1 d . . . 
H58A H 0.4823 0.6701 0.4982 0.126 Uiso 1 1 calc R . . 
H58B H 0.3728 0.6650 0.4509 0.126 Uiso 1 1 calc R . . 
H58C H 0.3792 0.7056 0.5112 0.126 Uiso 1 1 calc R . . 
C59 C 0.3251(5) 0.5902(3) 0.3592(3) 0.0480(13) Uani 1 1 d . . . 
C60 C 0.4098(6) 0.5525(3) 0.3880(3) 0.0611(17) Uani 1 1 d . . . 
C61 C 0.3914(7) 0.4943(4) 0.4107(4) 0.074(2) Uani 1 1 d . . . 
H61 H 0.4503 0.4711 0.4301 0.089 Uiso 1 1 calc R . . 
C62 C 0.2903(7) 0.4701(4) 0.4053(4) 0.076(2) Uani 1 1 d . . . 
C63 C 0.2038(7) 0.5069(4) 0.3772(4) 0.074(2) Uani 1 1 d . . . 
H63 H 0.1335 0.4915 0.3737 0.089 Uiso 1 1 calc R . . 
C64 C 0.2188(6) 0.5660(3) 0.3543(3) 0.0568(16) Uani 1 1 d . . . 
C65 C 0.5273(6) 0.5732(4) 0.3974(4) 0.079(2) Uani 1 1 d . . . 
H65A H 0.5552 0.5674 0.3593 0.119 Uiso 1 1 calc R . . 
H65B H 0.5693 0.5492 0.4301 0.119 Uiso 1 1 calc R . . 
H65C H 0.5318 0.6162 0.4087 0.119 Uiso 1 1 calc R . . 
C66 C 0.2709(9) 0.4055(4) 0.4285(6) 0.122(4) Uani 1 1 d . . . 
H66A H 0.3391 0.3845 0.4398 0.183 Uiso 1 1 calc R . . 
H66B H 0.2254 0.3829 0.3961 0.183 Uiso 1 1 calc R . . 
H66C H 0.2358 0.4084 0.4644 0.183 Uiso 1 1 calc R . . 
C67 C 0.1176(6) 0.6002(4) 0.3265(4) 0.072(2) Uani 1 1 d . . . 
H67A H 0.0557 0.5739 0.3264 0.109 Uiso 1 1 calc R . . 
H67B H 0.1218 0.6119 0.2843 0.109 Uiso 1 1 calc R . . 
H67C H 0.1104 0.6365 0.3508 0.109 Uiso 1 1 calc R . . 
  
loop_ 
 _atom_site_aniso_label 
 _atom_site_aniso_U_11 
 _atom_site_aniso_U_22 
 _atom_site_aniso_U_33 
 _atom_site_aniso_U_23 
 _atom_site_aniso_U_13 
 _atom_site_aniso_U_12 
Pt1 0.03572(12) 0.04471(13) 0.04254(13) -0.00575(9) 0.00898(9) -0.00186(9) 
Sn1 0.0457(2) 0.0637(3) 0.0448(2) -0.00447(19) 0.01459(18) 0.00128(19) 
Sn2 0.0372(2) 0.0471(2) 0.0457(2) -0.00239(16) 0.01137(16) 0.00072(15) 
N1 0.043(3) 0.059(3) 0.068(4) -0.011(3) 0.004(3) -0.006(2) 
N2 0.050(3) 0.054(3) 0.062(3) -0.008(3) 0.003(3) -0.007(3) 
C1 0.037(3) 0.052(3) 0.052(3) -0.009(3) 0.010(3) -0.004(2) 
C2 0.042(3) 0.085(5) 0.071(5) -0.028(4) 0.006(3) -0.012(3) 
C3 0.066(6) 0.221(15) 0.175(13) -0.108(12) -0.033(7) 0.045(8) 
C4 0.136(10) 0.131(10) 0.126(9) -0.020(8) 0.008(8) -0.078(8) 
C5 0.071(6) 0.174(11) 0.071(6) -0.015(6) 0.008(5) -0.022(6) 
C6 0.047(3) 0.051(3) 0.046(3) -0.009(3) 0.007(3) 0.003(3) 
C7 0.053(4) 0.055(4) 0.070(4) -0.008(3) 0.003(3) -0.011(3) 
C8 0.095(7) 0.136(9) 0.096(7) -0.065(6) 0.023(5) -0.054(6) 
C9 0.051(5) 0.108(7) 0.152(10) -0.030(7) 0.003(5) -0.004(5) 
C10 0.123(9) 0.080(6) 0.145(10) 0.029(7) -0.015(8) -0.028(6) 
C21 0.058(5) 0.127(8) 0.070(5) -0.001(5) 0.026(4) -0.027(5) 
C22 0.112(8) 0.123(9) 0.109(8) 0.010(7) 0.012(7) -0.063(7) 
C23 0.057(5) 0.208(13) 0.092(7) -0.018(7) 0.005(5) -0.010(7) 
C24 0.099(8) 0.258(16) 0.110(9) -0.028(10) 0.066(7) -0.071(10) 
C25 0.090(6) 0.077(6) 0.100(7) -0.001(5) 0.032(5) 0.036(5) 
C26 0.180(13) 0.111(9) 0.145(11) 0.044(8) 0.022(10) 0.057(9) 
C27 0.174(13) 0.114(9) 0.241(17) -0.012(10) 0.134(13) 0.049(9) 
C28 0.101(8) 0.070(6) 0.193(13) -0.030(7) 0.022(8) -0.001(6) 
C29 0.076(5) 0.090(6) 0.048(4) -0.004(4) 0.011(4) -0.007(4) 
C30 0.109(8) 0.210(14) 0.057(5) -0.028(7) 0.022(5) 0.006(9) 
C31 0.144(10) 0.102(8) 0.092(7) 0.020(6) -0.021(7) -0.013(7) 
C32 0.085(6) 0.134(8) 0.060(5) 0.000(5) -0.001(4) -0.010(6) 
C41 0.039(3) 0.047(3) 0.068(4) 0.001(3) 0.006(3) -0.001(3) 
C42 0.049(4) 0.057(4) 0.076(5) 0.001(3) -0.003(3) 0.003(3) 
C43 0.062(4) 0.059(4) 0.080(5) 0.012(4) -0.010(4) 0.004(3) 
C44 0.050(4) 0.052(4) 0.123(8) 0.008(5) -0.004(5) 0.001(3) 
C45 0.047(4) 0.043(4) 0.125(7) -0.006(4) 0.025(4) 0.006(3) 
C46 0.038(3) 0.054(4) 0.089(5) -0.004(3) 0.016(3) 0.000(3) 
C47 0.099(7) 0.101(7) 0.058(5) 0.003(4) 0.003(4) 0.030(5) 
C48 0.073(6) 0.073(6) 0.168(11) 0.027(6) -0.004(7) 0.019(5) 
C49 0.054(4) 0.090(6) 0.080(5) -0.010(4) 0.031(4) 0.007(4) 
C50 0.038(3) 0.055(4) 0.055(3) -0.011(3) 0.017(3) 0.002(3) 
C51 0.047(3) 0.052(4) 0.068(4) -0.010(3) 0.016(3) 0.003(3) 
C52 0.060(4) 0.056(4) 0.096(6) -0.018(4) 0.023(4) -0.001(3) 
C53 0.057(5) 0.101(6) 0.088(6) -0.049(5) 0.016(4) -0.002(4) 
C54 0.054(4) 0.102(6) 0.058(4) -0.031(4) 0.014(3) -0.001(4) 
C55 0.048(4) 0.080(5) 0.052(4) -0.016(3) 0.016(3) 0.004(3) 
C56 0.073(5) 0.054(4) 0.070(5) 0.003(3) 0.020(4) 0.000(3) 
C57 0.124(9) 0.110(8) 0.127(9) -0.061(7) 0.014(7) -0.036(7) 
C58 0.093(6) 0.105(7) 0.057(5) 0.001(4) 0.023(4) -0.003(5) 
C59 0.049(3) 0.050(3) 0.048(3) 0.003(3) 0.016(3) 0.001(3) 
C60 0.054(4) 0.067(4) 0.065(4) 0.007(3) 0.015(3) 0.006(3) 
C61 0.074(5) 0.070(5) 0.080(5) 0.017(4) 0.017(4) 0.013(4) 
C62 0.082(6) 0.057(4) 0.094(6) 0.013(4) 0.030(5) 0.003(4) 
C63 0.073(5) 0.064(5) 0.093(6) -0.001(4) 0.035(4) -0.014(4) 
C64 0.055(4) 0.054(4) 0.065(4) 0.003(3) 0.021(3) -0.001(3) 
C65 0.056(4) 0.097(6) 0.084(6) 0.029(5) 0.010(4) 0.014(4) 
C66 0.108(8) 0.070(6) 0.193(13) 0.053(7) 0.040(8) 0.002(5) 
C67 0.048(4) 0.070(5) 0.100(6) 0.011(4) 0.018(4) -0.005(3) 
  
_geom_special_details 
; 
 All esds (except the esd in the dihedral angle between two l.s. planes) 
 are estimated using the full covariance matrix.  The cell esds are taken 
 into account individually in the estimation of esds in distances, angles 
 and torsion angles; correlations between esds in cell parameters are only 
 used when they are defined by crystal symmetry.  An approximate (isotropic) 
 treatment of cell esds is used for estimating esds involving l.s. planes. 
; 
  
loop_ 
 _geom_bond_atom_site_label_1 
 _geom_bond_atom_site_label_2 
 _geom_bond_distance 
 _geom_bond_site_symmetry_2 
 _geom_bond_publ_flag 
Pt1 C6 1.944(6) . ? 
Pt1 C1 1.946(6) . ? 
Pt1 Sn2 2.6775(4) . ? 
Pt1 Sn1 2.6798(5) . ? 
Sn1 C29 2.221(8) . ? 
Sn1 C25 2.234(9) . ? 
Sn1 C21 2.243(8) . ? 
Sn2 C59 2.199(6) . ? 
Sn2 C50 2.208(6) . ? 
Sn2 C41 2.234(6) . ? 
N1 C1 1.137(7) . ? 
N1 C2 1.471(8) . ? 
N2 C6 1.143(8) . ? 
N2 C7 1.457(8) . ? 
C2 C5 1.505(11) . ? 
C2 C3 1.506(12) . ? 
C2 C4 1.543(14) . ? 
C7 C8 1.500(11) . ? 
C7 C9 1.506(11) . ? 
C7 C10 1.517(12) . ? 
C21 C23 1.482(13) . ? 
C21 C22 1.486(15) . ? 
C21 C24 1.513(12) . ? 
C25 C28 1.419(13) . ? 
C25 C27 1.512(13) . ? 
C25 C26 1.537(14) . ? 
C29 C30 1.523(12) . ? 
C29 C32 1.536(12) . ? 
C29 C31 1.541(13) . ? 
C41 C46 1.412(9) . ? 
C41 C42 1.442(10) . ? 
C42 C43 1.360(9) . ? 
C42 C47 1.527(11) . ? 
C43 C44 1.360(12) . ? 
C44 C45 1.372(12) . ? 
C44 C48 1.538(11) . ? 
C45 C46 1.401(10) . ? 
C46 C49 1.492(10) . ? 
C50 C51 1.412(9) . ? 
C50 C55 1.424(9) . ? 
C51 C52 1.407(10) . ? 
C51 C56 1.500(10) . ? 
C52 C53 1.393(12) . ? 
C53 C54 1.394(13) . ? 
C53 C57 1.501(11) . ? 
C54 C55 1.395(10) . ? 
C55 C58 1.497(11) . ? 
C59 C60 1.396(9) . ? 
C59 C64 1.415(9) . ? 
C60 C61 1.384(11) . ? 
C60 C65 1.516(10) . ? 
C61 C62 1.354(11) . ? 
C62 C63 1.395(11) . ? 
C62 C66 1.518(11) . ? 
C63 C64 1.396(10) . ? 
C64 C67 1.500(10) . ? 
  
loop_ 
 _geom_angle_atom_site_label_1 
 _geom_angle_atom_site_label_2 
 _geom_angle_atom_site_label_3 
 _geom_angle 
 _geom_angle_site_symmetry_1 
 _geom_angle_site_symmetry_3 
 _geom_angle_publ_flag 
C6 Pt1 C1 167.1(3) . . ? 
C6 Pt1 Sn2 87.03(18) . . ? 
C1 Pt1 Sn2 89.34(17) . . ? 
C6 Pt1 Sn1 92.05(18) . . ? 
C1 Pt1 Sn1 93.32(17) . . ? 
Sn2 Pt1 Sn1 171.499(16) . . ? 
C29 Sn1 C25 107.6(3) . . ? 
C29 Sn1 C21 106.2(3) . . ? 
C25 Sn1 C21 108.2(4) . . ? 
C29 Sn1 Pt1 109.4(2) . . ? 
C25 Sn1 Pt1 110.4(2) . . ? 
C21 Sn1 Pt1 114.8(2) . . ? 
C59 Sn2 C50 114.2(2) . . ? 
C59 Sn2 C41 113.4(2) . . ? 
C50 Sn2 C41 95.3(2) . . ? 
C59 Sn2 Pt1 103.71(16) . . ? 
C50 Sn2 Pt1 111.99(14) . . ? 
C41 Sn2 Pt1 118.76(18) . . ? 
C1 N1 C2 177.8(7) . . ? 
C6 N2 C7 175.1(7) . . ? 
N1 C1 Pt1 171.3(6) . . ? 
N1 C2 C5 107.9(6) . . ? 
N1 C2 C3 109.2(7) . . ? 
C5 C2 C3 111.7(9) . . ? 
N1 C2 C4 106.9(7) . . ? 
C5 C2 C4 110.1(8) . . ? 
C3 C2 C4 111.0(10) . . ? 
N2 C6 Pt1 173.9(6) . . ? 
N2 C7 C8 108.8(6) . . ? 
N2 C7 C9 107.9(6) . . ? 
C8 C7 C9 112.2(8) . . ? 
N2 C7 C10 107.4(6) . . ? 
C8 C7 C10 113.0(8) . . ? 
C9 C7 C10 107.3(8) . . ? 
C23 C21 C22 104.7(9) . . ? 
C23 C21 C24 111.6(9) . . ? 
C22 C21 C24 105.6(10) . . ? 
C23 C21 Sn1 110.2(7) . . ? 
C22 C21 Sn1 110.4(6) . . ? 
C24 C21 Sn1 113.9(7) . . ? 
C28 C25 C27 105.3(10) . . ? 
C28 C25 C26 103.9(10) . . ? 
C27 C25 C26 113.1(9) . . ? 
C28 C25 Sn1 112.5(6) . . ? 
C27 C25 Sn1 114.1(7) . . ? 
C26 C25 Sn1 107.6(7) . . ? 
C30 C29 C32 110.7(7) . . ? 
C30 C29 C31 106.2(9) . . ? 
C32 C29 C31 107.2(8) . . ? 
C30 C29 Sn1 112.0(6) . . ? 
C32 C29 Sn1 111.5(5) . . ? 
C31 C29 Sn1 109.0(6) . . ? 
C46 C41 C42 118.1(6) . . ? 
C46 C41 Sn2 119.2(5) . . ? 
C42 C41 Sn2 122.3(5) . . ? 
C43 C42 C41 119.1(7) . . ? 
C43 C42 C47 119.1(7) . . ? 
C41 C42 C47 121.9(6) . . ? 
C42 C43 C44 124.5(8) . . ? 
C43 C44 C45 116.4(7) . . ? 
C43 C44 C48 123.0(9) . . ? 
C45 C44 C48 120.6(9) . . ? 
C44 C45 C46 124.4(7) . . ? 
C45 C46 C41 117.7(7) . . ? 
C45 C46 C49 118.4(7) . . ? 
C41 C46 C49 123.9(6) . . ? 
C51 C50 C55 118.1(6) . . ? 
C51 C50 Sn2 115.9(4) . . ? 
C55 C50 Sn2 125.9(5) . . ? 
C52 C51 C50 119.8(7) . . ? 
C52 C51 C56 116.6(7) . . ? 
C50 C51 C56 123.6(6) . . ? 
C53 C52 C51 122.6(8) . . ? 
C52 C53 C54 116.9(7) . . ? 
C52 C53 C57 121.1(10) . . ? 
C54 C53 C57 122.0(9) . . ? 
C53 C54 C55 122.8(7) . . ? 
C54 C55 C50 119.8(7) . . ? 
C54 C55 C58 117.2(7) . . ? 
C50 C55 C58 123.0(6) . . ? 
C60 C59 C64 116.6(6) . . ? 
C60 C59 Sn2 117.7(5) . . ? 
C64 C59 Sn2 125.0(5) . . ? 
C61 C60 C59 122.1(7) . . ? 
C61 C60 C65 115.9(7) . . ? 
C59 C60 C65 122.0(6) . . ? 
C62 C61 C60 122.0(7) . . ? 
C61 C62 C63 117.4(7) . . ? 
C61 C62 C66 121.8(8) . . ? 
C63 C62 C66 120.8(8) . . ? 
C62 C63 C64 122.3(7) . . ? 
C63 C64 C59 119.6(7) . . ? 
C63 C64 C67 116.0(7) . . ? 
C59 C64 C67 124.4(6) . . ? 
  
_diffrn_measured_fraction_theta_max    1.000 
_diffrn_reflns_theta_full              28.00 
_diffrn_measured_fraction_theta_full   1.000 
_refine_diff_density_max    1.471 
_refine_diff_density_min   -0.573 
_refine_diff_density_rms    0.158 
